# Supplementary material
Source: publisher site journal article supplement (https://www.spandidos-publications.com/7955/downloadSupplementary)
Supplement: Supplementary file 1 [file downloadSupplementary]

Table SI. Primer sequences for qPCR analysis of inflammation-related and signaling pathway genes in human synovial cells (SW982).

| Gene                   | Forward (5'→3')         | Reverse (5'→3')          |
|------------------------|-------------------------|--------------------------|
| MAPK14 (p38 $\alpha$ ) | GAGCGTTACCAGAACCTGTCTC  | AGTAACCGCAGTTCTCTGTAGGT  |
| MAPKAPK2               | ACGGTGGAGAACTCTTTAGCCG  | CTTGACATCCCGATGGGCAATG   |
| DUSP1 (MKP-1)          | CAACCACAAGGCAGACATCAGC  | GTAAGCAAGGCAGATGGTGGCT   |
| IL-6                   | ACTCACCTCTTCAGAACGAATTG | CCATCTTTGGAAGGTTTCAGGTTG |
| TNF- $\alpha$          | CTCTTCTGCCTGCTGCACTTTG  | ATGGGCTACAGGCTTGTCCTC    |
| MMP13                  | CCTTGATGCCATTACCAGTCTCC | AAACAGCTCCGCATCAACCTGC   |
| GAPDH                  | GCAAATTCCATGGCACCGT     | TCGCCCACTTGATTTTGG       |

Table SII. Primer sequences for qPCR analysis of target genes in rat synovial tissue

| Gene                | Forward (5'→3')          | Reverse (5'→3')          |
|---------------------|--------------------------|--------------------------|
| IL-6 (rat)          | ACTTCACAAGTCGGAGGCTT     | AGTGCATCATCGCTGTTTCAT    |
| TNF- $\alpha$ (rat) | ATGGGCTCCCTCTCATCAGTTCC  | GCTCCTCCGCTTGGTGGTTTG    |
| Mmp13 (rat)         | CAAGCAGCTCCAAAGGCTAC     | TGGCTTTTGCCAGTGTAGGT     |
| Mapk14 (rat)        | CCGAACGATACCAGAACCTGTC   | ACGCAACTCTCGGTAGGTCCTT   |
| GAPDH (rat)         | AAGCCCATCACCATCTTCCAGGAG | ATGAGCCCTTCCACAATGCCAAAG |
